# Supplementary figures and images for: Usage of Inhalative Sedative for Sedation and Treatment of Patient with Severe Brain Injury in Germany, a Nationwide Survey
Source: MDPI journal article supplement (doi:10.3390/jcm12196401), 2023-10-08

## IsoSurvey – Questionnaire

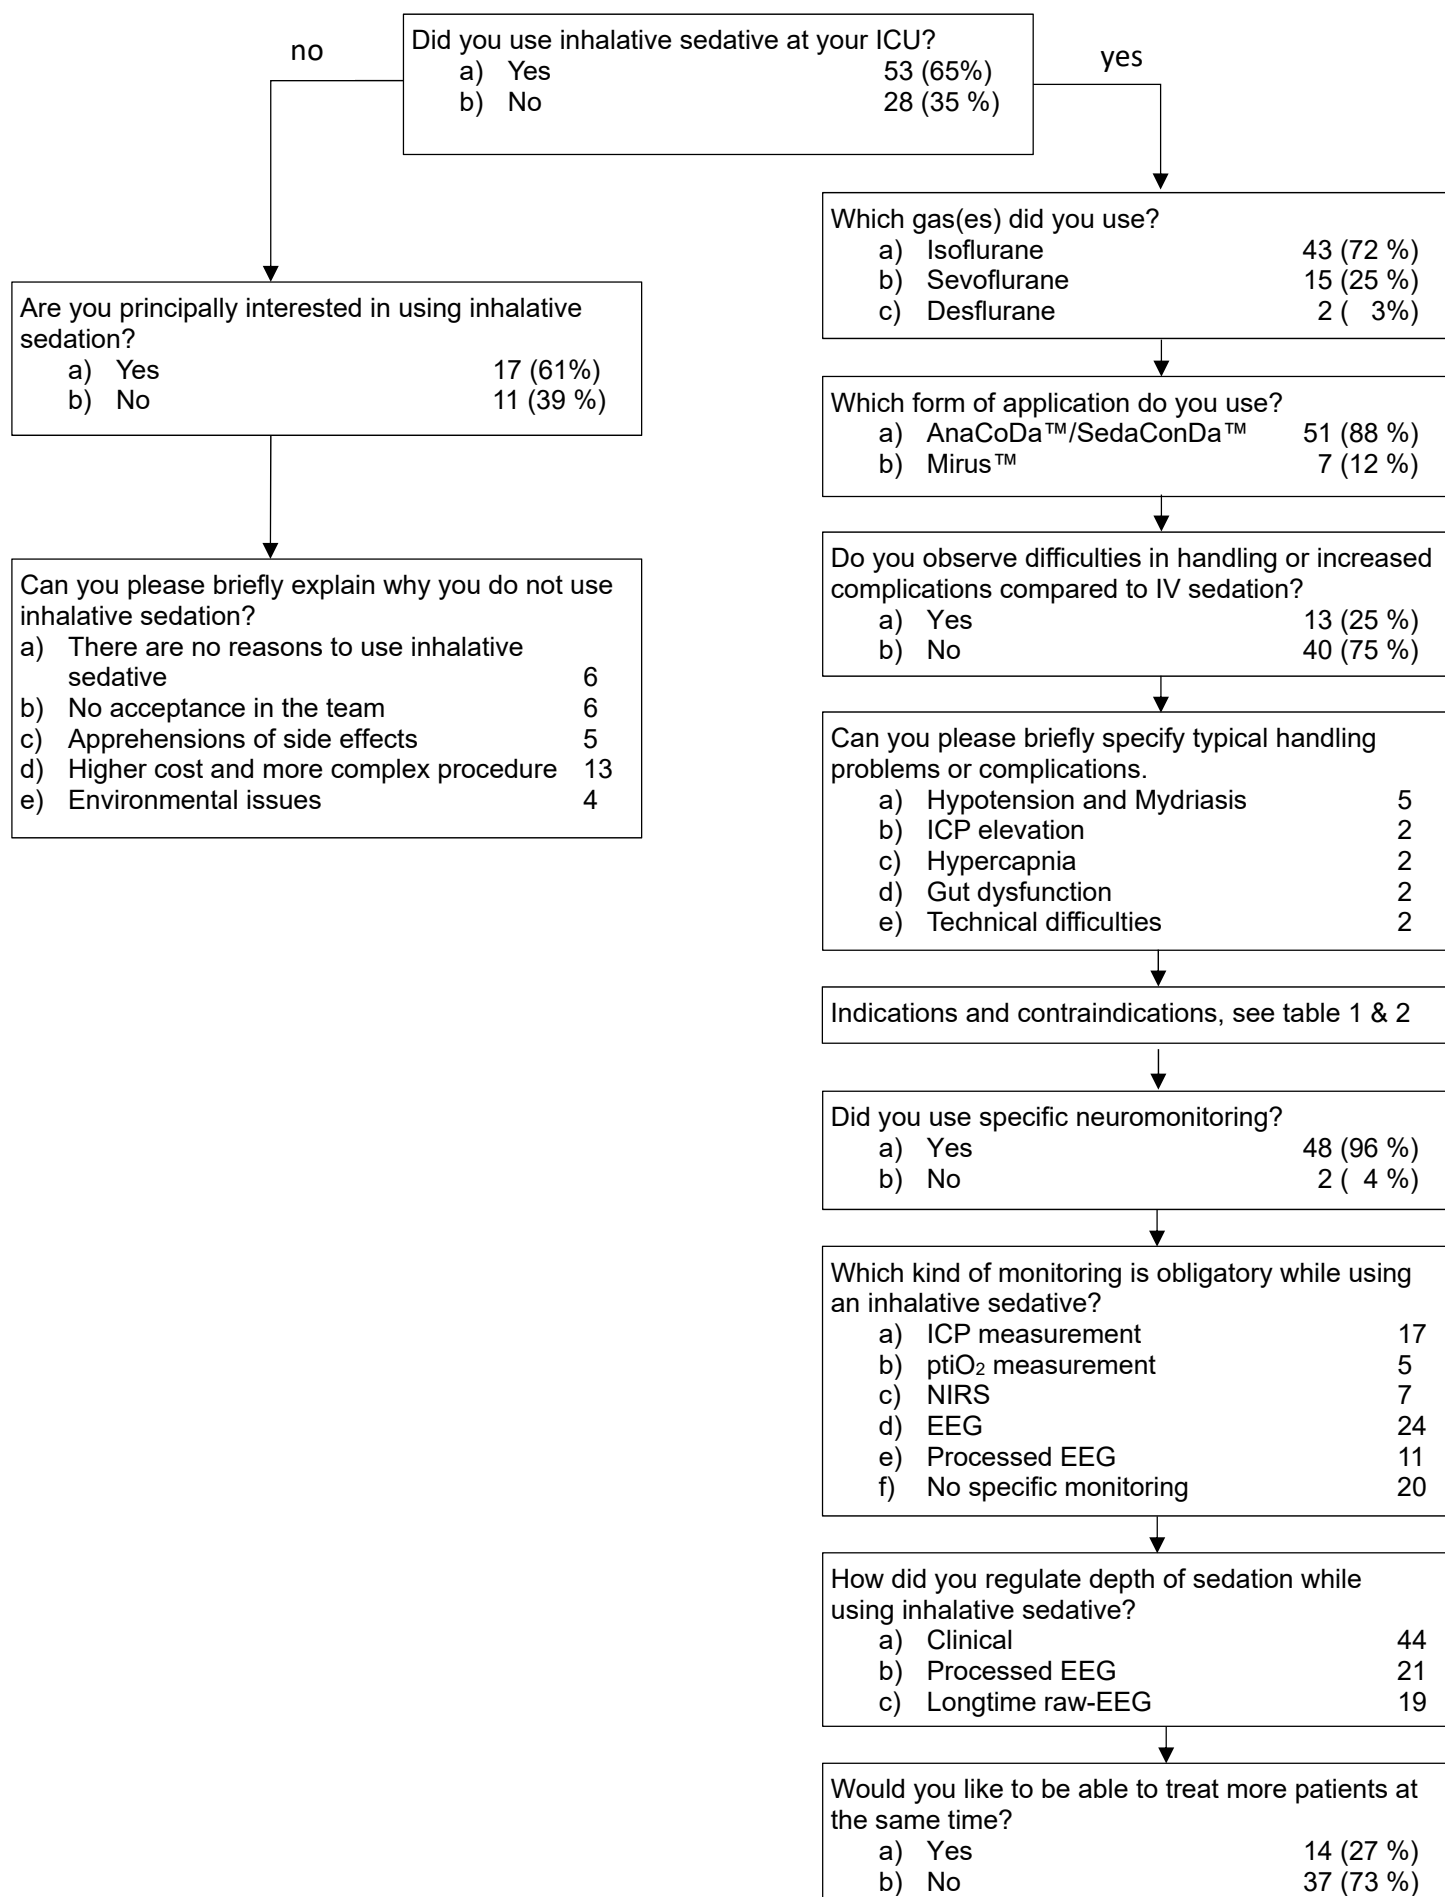

Supplement: s1 [file s1]
